# Supplementary material for: Quality of Life and Mental Health in Children and Adolescents after the First Year of the COVID-19 Pandemic: A Large Population-Based Survey in South Tyrol, Italy
Source: MDPI journal article supplement (doi:10.3390/ijerph19095220), 2022-04-25
Supplement: s1 [file s1]

## Supplementary Materials

**Table S1.** Sociodemographic characteristics of the COPSy South Tyrol 2021 sample aged 11–17 years

|                                     | Children and adolescents aged<br>11–19 years (parent-report) |             | Children and adolescents aged<br>11–19 years (self-report) |             |
|-------------------------------------|--------------------------------------------------------------|-------------|------------------------------------------------------------|-------------|
|                                     | (n = 3220)                                                   |             | (n = 2163)                                                 |             |
|                                     | n (%)                                                        | M (SD)      | n (%)                                                      | M (SD)      |
| Age                                 |                                                              | 14.36(2.39) |                                                            | 14.25(2.36) |
| 11–13 years                         | 1357 (42.1%)                                                 |             | 949 (43.95%)                                               |             |
| 14–19 years <sup>a</sup>            | 1863 (57.9%)                                                 |             | 1214 (56.05%)                                              |             |
| Gender                              |                                                              |             |                                                            |             |
| Male                                | 1579 (49%)                                                   |             | 1062 (49.1%)                                               |             |
| Female                              | 1637 (50.8%)                                                 |             | 1099(50.8%)                                                |             |
| Other                               | 4 (0.1%)                                                     |             | 2 (0.1%)                                                   |             |
| Age of the parent, years            |                                                              | 46.74 (5.6) |                                                            | 46.75 (5.5) |
| Migration background                |                                                              |             |                                                            |             |
| No                                  | 2459 (76.4%)                                                 |             | 1763 (81.5%)                                               |             |
| Yes                                 | 327 (10.2%)                                                  |             | 226(10.4%)                                                 |             |
| Parental education                  |                                                              |             |                                                            |             |
| Low                                 | 745(23.1%)                                                   |             | 524 (24.2%)                                                |             |
| Moderate                            | 817 (25.4%)                                                  |             | 547 (25.3%)                                                |             |
| High                                | 1500 (46.6%)                                                 |             | 1004 (46.4%)                                               |             |
| No information                      | 158 (4.9%)                                                   |             | 88 (4.1%)                                                  |             |
| Single parenthood                   |                                                              |             |                                                            |             |
| No                                  | 2806 (87.1%)                                                 |             | 1945 (89.9%)                                               |             |
| Yes                                 | 287 (8.9%)                                                   |             | 180 (8.3%)                                                 |             |
| Occupational status                 |                                                              |             |                                                            |             |
| Full-time employed                  | 904 (28.1%)                                                  |             | 616 (28.5%)                                                |             |
| Part-time employed                  | 1450 (45%)                                                   |             | 1040 (48.1%)                                               |             |
| Self-employed                       | 461 (14.3%)                                                  |             | 289 (13.4%)                                                |             |
| Other employment                    | 59 (1.8%)                                                    |             | 42 (1.9%)                                                  |             |
| Housewife/househusband              | 172 (5.3%)                                                   |             | 130 (6%)                                                   |             |
| Retiree/pensioner                   | 15 (0.5%)                                                    |             | 12 (0.6%)                                                  |             |
| On parental leave                   | 25 (0.8%)                                                    |             | 12 (0.6%)                                                  |             |
| Unemployed                          | 31 (1%)                                                      |             | 19 (0.9%)                                                  |             |
| COVID-19                            |                                                              |             |                                                            |             |
| A family member contracted COVID-19 | 957 (29.7%)                                                  |             | 658 (30.4%)                                                |             |
| A relative died of COVID-19         | 464 (14.4%)                                                  |             | 333 (15.4%)                                                |             |

Unweighted data  
M mean; SD standard deviation
